# Supplementary material
Source: Research Square preprint supplement (doi:10.21203/rs.3.rs-9472636/v1)
Supplement: Supplementary file 1 [file 52bfb23c505f22e59596f080.docx]

**Table 3: Mean EQ-5D-5L index score by sociodemographic characteristics in total sample and by gender (weighted sample)**

|  | **Total** | | **Male gender** | | **Female gender** | | **Diverse gender** |  |  |  |
| --- | --- | --- | --- | --- | --- | --- | --- | --- | --- | --- |
|  | n | Mean (SD) | n | Mean (SD) | n | Mean (SD) | n | Mean  (SD) |  |  |
| Total sample | 5,504 | 0.84 (0.21) | 2,682 | 0.85 (0.20) * | 2,811 | 0.82 (0.22) * | 11 | 0.85 (0.13) * |  |  |
| Age category, years |  |  |  |  |  |  |  |  |  |  |
| 18-24 | 486 | 0.83 (0.19) * | 250 | 0.84(0.20) * | 231 | 0.83 (0.17) * | 5 | 0.83 (0.04) |  |  |
| 25-34 | 831 | 0.85 (0.20) | 430 | 0.86 (0.19) | 401 | 0.84 (0.22) | 1 | 1 |  |  |
| 35-44 | 854 | 0.85 (0.21) | 428 | 0.87  (0.22) | 420 | 0.84 (0.20) | 6 | 0.84 (0.17) |  |  |
| 45-54 | 848 | 0.84 (0.20) | 423 | 0.86 (0.19) | 425 | 0.82 (0.22) | 0 |  |  |  |
| 55-64 | 1,023 | 0.81 (0.23) | 508 | 0.83 (0.22) | 516 | 0.79 (0.25) | 0 |  |  |  |
| 65-74 | 1,156 | 0.84 (0.19) | 466 | 0.86 (0.16) | 691 | 0.83 (0.21) | 0 |  |  |  |
| ≥ 75 | 306 | 0.83 (0.21) | 178 | 0.86 (0.17) | 128 | 0.78 (0.26) | 0 |  |  |  |
| Cohabitation |  |  |  |  |  |  |  |  |  |  |
| 1 adult | 2,248 | 0.83 (0.21) * | 1,080 | 0.84 (0.20) * | 1,164 | 0.81 (0.22) | 4 | 0.87 (0.08) |  |  |
| 1 adult & at least 1 child | 174 | 0.80 (0.26) | 56 | 0.77 (0.26) | 118 | 0.82 (0.25) | 0 |  |  |  |
| At least 2 adults | 2,052 | 0.84 (0.21) | 999 | 0.84 (0.19) | 1,048 | 0.82 (0.22) | 4 | 0.75 (0.15) |  |  |
| At least 2 adults & at least 1 child | 1,030 | 0.86 (0.20) | 547 | 0.87 (0.21) | 480 | 0.85 (0.20) | 3 | 0.95 (0.05) |  |  |
| Education |  |  |  |  |  |  |  |  |  |  |
| Low qualification | 936 | 0.80 (0.23) * | 459 | 0.82 (0.22) * | 476 | 0.77  (0.24) * | 1 | 0.86 |  |  |
| Middle qualification | 3,085 | 0.84  (0.20) | 1,369 | 0.85 (0.18) | 1,712 | 0.83  (0.21) | 4 | 0.83 (0.18) |  |  |
| High qualification | 1,461 | 0.86 (0.22) | 843 | 0.87 (0.21) | 614 | 0.84 (0.22) | 4 | 0.87 (0.10) |  |  |
| No graduation/other | 22 | 0.87 (0.16) | 12 | 0.86 (0.17) | 9 | 0.88 (0.16) | 1 | 0.80 |  |  |
| Employment |  |  |  |  |  |  |  |  |  |  |
| Full-time employed | 2,268 | 0.88 (0.17) * | 1,368 | 0.88 (0.17) * | 896 | 0.87 (0.18) * | 4 | 0.89 (0.09) |  |  |
| Part-time employed | 695 | 0.84 (0.19) | 203 | 0.85 (0.17) | 492 | 0.84 (0.20) | 0 |  |  |  |
| Marginally employed | 191 | 0.84 (0.19) | 81 | 0.86 (0.16) | 109 | 0.83 (0.21) | 1 | 0.80 |  |  |
| Not employed | 464 | 0.81 (0.22) | 196 | 0.82 (0.22) | 266 | 0.81 (0.21) | 2 | 0.80 (0.04) |  |  |
| Retired | 1,598 | 0.79 (0.24) | 719 | 0.82 (0.22) | 877 | 0.77 (0.26) | 2 | 0.80 (0.24) |  |  |
| Apprenticeship/other | 289 | 0.79 (0.23) | 115 | 0.79 (0.25) | 171 | 0.79 (0.22) | 2 | 0.87 (0.01) |  |  |
| Federal states |  |  |  |  |  |  |  |  |  |  |
| Former Federal Republic of  Germany (FRG) | 4,165 | 0.84 (0.21) | 2,011 | 0.85 (0.20) | 2,145 | 0.82 (0.22) | 10 | 0.83 (0.13) |  |  |
| Former German Democratic  Republic (GDR)  and Berlin | 1,339 | 0.83  (0.20) | 671 | 0.85 (0.18) | 667 | 0.82 (0.22) | 1 | 0.94 |  |  |
| Size of municipality |  |  |  |  |  |  |  |  |  |  |
| <2,000 | 245 | 0.83 (0.21) * | 122 | 0.86 (0.19) * | 123 | 0.81 (0.22) | 0 |  |  |  |
| 2,000 to <5,000 | 133 | 0.84 (0.23) | 59 | 0.85 (0.22) | 74 | 0.82 (0.24) | 1 | 0.92 |  |  |
| 5,000 to <20,000 | 501 | 0.82 (0.22) | 250 | 0.85 (0.19) | 249 | 0.80 (0.24) | 1 | 0.79 |  |  |
| 20,000 to <50,000 | 530 | 0.83 (0.21) | 239 | 0.84 (0.19) | 290 | 0.81 (0.21) | 1 | 0.88 |  |  |
| 50,000 to <100,000 | 379 | 0.82 (0.22) | 178 | 0.84 (0.21) | 201 | 0.80 (0.24) | 1 | 1 |  |  |
| 100,000 to <500,000 | 1,549 | 0.84 (0.20) | 761 | 0.85 (0.19) | 787 | 0.82 (0.21) | 1 | 0.86 |  |  |
| ≥500,000 | 1,989 | 0.85 (0.20) | 971 | 0.87 (0.19) | 1,013 | 0.84 (0.21) | 5 | 0.83 (0.17) |  |  |
| Medical conditions |  |  |  |  |  |  |  |  |  |  |
| 0 medical conditions | 1,687 | 0.92 (0.14) * | 912 | 0.93 (0.13) * | 772 | 0.91 (0.14) * | 4 | 0.90 (0.08) |  |  |
| 1 medical conditions | 1,448 | 0.84 (0.20) | 735 | 0.84 (0.20) | 709 | 0.84 (0.20) | 4 | 0.82 (0.05) |  |  |
| 2 medical conditions | 932 | 0.84 (0.18) | 442 | 0.85 (0.17) | 489 | 0.83 (0.19) | 1 | 0.65 |  |  |
| 3 or more medical conditions | 1,437 | 0.73 (0.26) | 594 | 0.75 (0.25) | 841 | 0.72 (0.26) | 1 | 0.97 |  |  |
|  |  |  |  |  |  |  |  |  |  |  |

* p≤0.0007

**Table 4: Mean EQ-VAS score by sociodemographic characteristics in total sample and by gender (weighted sample)**

|  | **Total** | | **Male gender** | | **Female gender** | | **Diverse gender** |  |  |  |
| --- | --- | --- | --- | --- | --- | --- | --- | --- | --- | --- |
|  | n | Mean (SD) | n | Mean (SD) | n | Mean (SD) | n | Mean  (SD) |  |  |
| Total sample | 5,504 | 69.64 (20.64) | 2,682 | 71.03 (20.45) * | 2,811 | 68.33 (20.75) * | 11 | 65.15 (17.08) * |  |  |
| Age category, years |  |  |  |  |  |  |  |  |  |  |
| 18-24 | 486 | 74.43 (17.91) * | 250 | 77.35 (17.41) * | 231 | 71.51 (17.96) * | 5 | 61.55 (11.38) |  |  |
| 25-34 | 831 | 75.88 (19.72) | 430 | 78.80 (18.28) | 401 | 72.71 (20.68) | 1 | 100 |  |  |
| 35-44 | 854 | 73.27 (19.68) | 428 | 76.17  (18.71) | 420 | 70.44 (20.22) | 6 | 63.97 (17.39) |  |  |
| 45-54 | 848 | 69.04 (19.97) | 423 | 70.84 (19.59) | 425 | 67.25 (20.18) | 0 |  |  |  |
| 55-64 | 1,023 | 64.91 (21.71) | 508 | 65.37 (21.84) | 516 | 64.46 (21.57) | 0 |  |  |  |
| 65-74 | 1,156 | 66.65 (20.34) | 466 | 64.49 (20.16) | 691 | 68.10 (20.34) | 0 |  |  |  |
| ≥ 75 | 306 | 63.77 (21.30) | 178 | 64.88 (19.62) | 128 | 62.21 (23.34) | 0 |  |  |  |
| Cohabitation |  |  |  |  |  |  |  |  |  |  |
| 1 adult | 2,248 | 67.38 (21.28) * | 1,080 | 68.03 (21.74) * | 1,164 | 66.82 (20.82) * | 4 | 55 (16.33) |  |  |
| 1 adult & at least 1 child | 174 | 71.06 (19.91) | 56 | 71.57 (17.33) | 118 | 70.82 (21.03) | 0 |  |  |  |
| At least 2 adults | 2,052 | 69.32 (20.09) | 999 | 69.32 (19.56) | 1,048 | 68.26 (20.57) | 4 | 65.72 (11.58) |  |  |
| At least 2 adults & at least 1 child | 1,030 | 74.99 (19.45) | 547 | 78.00 (17.97) | 480 | 71.53 (20.51) | 3 | 81.25 (11.39) |  |  |
| Education |  |  |  |  |  |  |  |  |  |  |
| Low qualification | 936 | 64.55 (22.90) * | 459 | 65.88 (23.37) * | 476 | 63.30  (22.40) * | 1 | 55 |  |  |
| Middle qualification | 3,085 | 69.10  (20.35) | 1,369 | 70.08 (20.13) | 1,712 | 68.32  (20.50) | 4 | 68.39 (8.59) |  |  |
| High qualification | 1,461 | 73.89 (18.82) | 843 | 75.20 (18.37) | 614 | 72.18 (19.22) | 4 | 61.74 (23.41) |  |  |
| No graduation/other | 22 | 79.97 (17.56) | 12 | 85.06 (12.15) | 9 | 72.86 (21.21) | 1 | 85 |  |  |
| Employment |  |  |  |  |  |  |  |  |  |  |
| Full-time employed | 2,268 | 75.63 (17.69) * | 1,368 | 76.94 (16.88) * | 896 | 73.69 (18.63) * | 4 | 64.73 (23.97) |  |  |
| Part-time employed | 695 | 70.07 (19.83) | 203 | 71.62 (20.41) | 492 | 69.44 (19.55) | 0 |  |  |  |
| Marginally employed | 191 | 67.46 (21.49) | 81 | 69.43 (20.11) | 109 | 65.89 (22.36) | 1 | 85 |  |  |
| Not employed | 464 | 66.43 (20.85) | 196 | 65.36 (20.94) | 266 | 67.25 (20.80) | 2 | 61.42 (3.98) |  |  |
| Retired | 1,598 | 62.50 (21.73) | 719 | 61.72 (21.72) | 877 | 63.11 (21.74) | 2 | 73.32 (2.36) |  |  |
| Apprenticeship/other | 289 | 67.54 (22.74) | 115 | 68.59 (25.02) | 171 | 67.02 (21.13) | 2 | 53.45 (2.31) |  |  |
| Federal states |  |  |  |  |  |  |  |  |  |  |
| Former Federal Republic of  Germany (FRG) | 4,165 | 70.21 (20.52) | 2,011 | 72.11 (20.17) * | 2,145 | 68.46 (20.70) | 10 | 64.14 (17.96) |  |  |
| Former German Democratic  Republic (GDR)  and Berlin | 1,339 | 67.87  (20.92) | 671 | 67.81 (20.93) | 667 | 67.92 (20.93) | 1 | 72.50 |  |  |
| Size of municipality |  |  |  |  |  |  |  |  |  |  |
| <2,000 | 245 | 67.14 (21.90) * | 122 | 67.28 (20.40) | 123 | 66.99 (23.28) | 0 |  |  |  |
| 2,000 to <5,000 | 133 | 69.99 (20.61) | 59 | 69.58 (21.24) | 74 | 70.22 (20.16) | 1 | 80 |  |  |
| 5,000 to <20,000 | 501 | 70.17 (20.47) | 250 | 73.49 (20.20) | 249 | 67.03 (20.11) | 1 | 35 |  |  |
| 20,000 to <50,000 | 530 | 67.60 (20.40) | 239 | 68.33 (20.34) | 290 | 67.03 (20.43) | 1 | 50 |  |  |
| 50,000 to <100,000 | 379 | 67.30 (19.82) | 178 | 69.26 (18.53) | 201 | 65.58 (20.77) | 1 | 70 |  |  |
| 100,000 to <500,000 | 1,549 | 69.33 (20.35) | 761 | 71.11 (19.78) | 787 | 67.63 (20.76) | 1 | 55 |  |  |
| ≥500,000 | 1,989 | 70.78 (20.74) | 971 | 71.60 (20.86) | 1,013 | 69.99 (20.64) | 5 | 73.11 (11.98) |  |  |
| Medical conditions |  |  |  |  |  |  |  |  |  |  |
| 0 medical conditions | 1,687 | 79.49 (17.14) * | 912 | 80.64 (16.79) * | 772 | 78.15 (17.43) * | 4 | 72.54 (17.40) |  |  |
| 1 medical conditions | 1,448 | 70.75 (19.29) | 735 | 70.99 (19.41) | 709 | 70.61 (19.15) | 4 | 53.77 (15.75) |  |  |
| 2 medical conditions | 932 | 66.98 (19.57) | 442 | 67.26 (18.99) | 489 | 66.72 (20.10) | 1 | 72.35 |  |  |
| 3 or more medical conditions | 1,437 | 58.71 (20.63) | 594 | 59.16 (20.69) | 841 | 58.36 (20.59) | 1 | 75 |  |  |
|  |  |  |  |  |  |  |  |  |  |  |

* p≤0.0007

Table 5: Generalized linear models of EQ-5D-5L disutility scores and EQ-VAS scores with selected sociodemographic characteristics (weighted sample)

| Variable | EQ-5D-5L disutility scores | | | | | | |  | EQ-VAS scores | | | | | | |
| --- | --- | --- | --- | --- | --- | --- | --- | --- | --- | --- | --- | --- | --- | --- | --- |
| Model 1 (n=5,504) | | |  | Model 2 (n=5,504) | |  |  | Model 3 (n=5,488) | | |  | Model 4 (n=5,488) | | |
| Beta | 95% CI | *p*-value |  | Beta | 95% CI | *p*-value |  | Beta | 95% CI | *p*-value |  | Beta | 95% CI | *p*-value |
| Gender (Ref. male) |  |  |  |  |  |  |  |  |  |  |  |  |  |  |  |
| female | **0.20** | **0.13; 0.27** | **<0.001** |  | **0.09** | **0.02; 0.16** | **0.011** |  | **−0.03** | **−0.05; −0.02** | **<0.001** |  | −0.00 | −0.02; 0.01 | 0.687 |
| diverse | 0.10 | -0.39; 0.59 | 0.693 |  | -0.19 | -0.84; 0.46 | 0.561 |  | −0.15 | −0.31; 0.01 | 0.067 |  | **­**−0.10 | −0.29; 0.09 | 0.312 |
| Age category (Ref. 18-24) |  |  |  |  |  |  |  |  |  |  |  |  |  |  |  |
| 25-34 | -0.13 | -0.28; 0.01 | 0.064 |  | -0.04 | -0.19; 0.10 | 0.543 |  | 0.01 | −0.02; 0.04 | 0.452 |  | −0.02 | −0.05; 0.01 | 0.190 |
| 35-44 | **-0.14** | **-0.28;** −**0.00** | **0.042** |  | **-0.18** | **-0.32;** −**0.05** | **0.008** |  | -0.02 | −0.05; 0.01 | 0.231 |  | −0.02 | −0.05; 0.00 | 0.094 |
| 45-54 | -0.05 | -0.18; 0.08 | 0.450 |  | **-0.16** | **-0.29;** −**0.03** | **0.014** |  | **−0.07** | **−0.10; −0.04** | **<0.001** |  | **−0.05** | **−0.08; −0.03** | **<0.001** |
| 55-64 | 0.10 | -0.02; 0.23 | 0.094 |  | **-0.22** | **-0.35;** −**0.09** | **0.001** |  | **−0.13** | **−0.16; −0.10** | **<0.001** |  | **−0.06** | **−0.10; −0.03** | **<0.001** |
| 65-74 | -0.12 | -0.25; 0.01 | 0.077 |  | **-0.73** | **-0.89;** −**0.57** | **<0.001** |  | **−0.09** | **−0.12; −0.07** | **<0.001** |  | **0.05** | **0.02; 0.09** | **0.005** |
| ≥ 75 | 0.02 | -0.18; 0.21 | 0.855 |  | **-0.74** | **-0.95;** −**0.53** | **<0.001** |  | **−0.15** | **−0.20; −0.10** | **<0.001** |  | 0.04 | −0.02; 0.09 | 0.178 |
| Education (Ref. low qualification) |  |  |  |  |  |  |  |  |  |  |  |  |  |  |  |
| Middle qualification | **−0.26** | **-0.36;** −**0.17** | **<0.001** |  | **−0.22** | **−0.31; −0.13** | **<0.001** |  | **0.07** | **0.04; 0.09** | **<0.001** |  | **0.05** | **0.03; 0.08** | **<0.001** |
| High qualification | **−0.33** | **-0.45;** −**0.22** | **<0.001** |  | **−0.20** | **−0.31; −0.09** | **<0.001** |  | **0.11** | **0.08; 0.14** | **<0.001** |  | **0.07** | **0.04; 0.10** | **<0.001** |
| No graduation/other | -0.45 | -0.94; 0.04 | 0.074 |  | −0.35 | −0.76; 0.07 | 0.106 |  | **0.14** | **0.05; 0.24** | **0.002** |  | **0.14** | **0.06; 0.23** | **0.001** |
| Medical conditions (Ref. 0 medical conditions) |  |  |  |  |  |  |  |  |  |  |  |  |  |  |  |
| 1 medical conditions |  |  |  |  | **0.65** | **0.55; 0.75** | **<0.001** |  |  |  |  |  | **−0.10** | **−0.11; −0.08** | **<0.001** |
| 2 medical conditions |  |  |  |  | **0.68** | **0.57; 0.79** | **<0.001** |  |  |  |  |  | **−0.14** | **−0.16; −0.12** | **<0.001** |
| 3 or more medical conditions |  |  |  |  | **1.16** | **1.06; 1.26** | **<0.001** |  |  |  |  |  | **−0.26** | **−0.28; −0.23** | **<0.001** |
| Health insurance (Ref. statutory health insurance) |  |  |  |  |  |  |  |  |  |  |  |  |  |  |  |
| Statutory health insurance plus private supplementary insurance(s) |  |  |  |  | **−0.16** | **−0.24; −0.08** | **<0.001** |  |  |  |  |  | **0.05** | **0.03; 0.07** | **<0.001** |
| Private health insurance |  |  |  |  | −0.10 | −0.22; 0.03 | 0.130 |  |  |  |  |  | **0.05** | **0.03; 0.08** | **<0.001** |
| No health insurance/other |  |  |  |  | 0.13 | −0.06; 0.33 | 0.186 |  |  |  |  |  | 0.03 | −0.01; 0.07 | 0.190 |
| Employment (Ref. full-time employed) |  |  |  |  |  |  |  |  |  |  |  |  |  |  |  |
| Part-time employed |  |  |  |  | **0.14** | **0.03; 0.24** | **0.010** |  |  |  |  |  | **−0.05** | **−0.07; −0.02** | **<0.001** |
| Marginally employed |  |  |  |  | 0.09 | −0.09; 0.28 | 0.320 |  |  |  |  |  | **−0.09** | **−0.14; −0.04** | **<0.001** |
| Not employed |  |  |  |  | **0.25** | **0.13; 0.37** | **<0.001** |  |  |  |  |  | **−0.10** | **−0.13; −0.07** | **<0.001** |
| Retired |  |  |  |  | **0.58** | **0.47; 0.70** | **<0.001** |  |  |  |  |  | **−0.16** | **−0.19; −0.12** | **<0.001** |
| Apprenticeship/Other |  |  |  |  | **0.42** | **0.27; 0.57** | **<0.001** |  |  |  |  |  | **−0.10** | **−0.15; −0.06** | **<0.001** |
| Cohabitation (Ref. 1 adult) |  |  |  |  |  |  |  |  |  |  |  |  |  |  |  |
| 1 adult & at least 1 child |  |  |  |  | 0.14 | −0.04; 0.33 | 0.118 |  |  |  |  |  | 0.02 | −0.02; 0.06 | 0.234 |
| At least 2 adults |  |  |  |  | −0.02 | −0.10; 0.05 | 0.557 |  |  |  |  |  | **0.02** | **0.00;**  **0.04** | **0.014** |
| At least 2 adults & at least 1 child |  |  |  |  | −0.01 | −0.11; 0.08 | 0.760 |  |  |  |  |  | **0.03** | **0.01;**  **0.05** | **0.014** |
| Constant | **−1.64** | **−1.77; −1.51** | **<0.001** |  | **−2.29** | **−2.46; −2.13** | **<0.001** |  | **4.26** | **4.22; 4.29** | **<0.001** |  | **4.36** | **4.32; 4.39** | **<0.001** |
