# Supplementary material
Source: Research Square preprint supplement (doi:10.21203/rs.3.rs-9472636/v1)
Supplement: Supplementary file 2 [file c91e357f305898d5bf1a6fee.docx]

**Appendix 1**

**Table A1: Frequencies of item responses in each EQ-5D-5L dimension by age category in percent (%; weighted sample)**

|  | **Total (n=5004)** | **18-24 (n=486)** | **25-34 (n=831)** | **35-44 (n=854)** | **45-54 (n=848)** | **55-64 (n=1023)** | **65-74 (n=1156)** | **≥ 75 (n=306)** |
| --- | --- | --- | --- | --- | --- | --- | --- | --- |
| Mobility |  |  |  |  |  |  |  |  |
| No problems | 51.65 | 55.01 | 59.68 | 58.05 | 53.80 | 46.54 | 45.01 | 42.81 |
| Slight problems | 27.99 | 30.62 | 28.89 | 28.08 | 27.43 | 25.90 | 28.63 | 27.33 |
| Moderate problems | 14.34 | 12.42 | 8.65 | 10.67 | 13.61 | 17.42 | 18.68 | 18.38 |
| Severe problems | 5.20 | 1.18 | 2.00 | 2.18 | 4.27 | 9.24 | 6.98 | 11.15 |
| Extreme problems | 0.82 | 0.77 | 0.79 | 1.03 | 0.89 | 0.90 | 0.70 | 0.33 |
| Self-care |  |  |  |  |  |  |  |  |
| No problems | 78.84 | 73.84 | 74.24 | 79.34 | 80.72 | 79.07 | 82.73 | 77.09 |
| Slight problems | 12.79 | 15.73 | 16.09 | 13.85 | 11.08 | 11.02 | 11.14 | 13.05 |
| Moderate problems | 6.35 | 7.85 | 6.71 | 5.12 | 6.43 | 7.10 | 5.24 | 7.85 |
| Severe problems | 1.49 | 1.86 | 1.69 | 0.83 | 1.57 | 2.29 | 0.78 | 2.01 |
| Extreme problems | 0.54 | 0.72 | 1.28 | 0.85 | 0.20 | 0.52 | 0.11 | 0 |
| Usual activities |  |  |  |  |  |  |  |  |
| No problems | 59.72 | 57.30 | 64.46 | 63.03 | 59.18 | 56.32 | 59.80 | 54.04 |
| Slight problems | 24.21 | 24.16 | 21.93 | 23.79 | 26.07 | 22.93 | 25.49 | 26.01 |
| Moderate problems | 10.51 | 12.25 | 8.14 | 8.96 | 10.02 | 12.13 | 10.44 | 14.67 |
| Severe problems | 4.47 | 4.38 | 4.02 | 2.44 | 3.86 | 7.97 | 3.48 | 5.28 |
| Extreme problems | 1.09 | 1.91 | 1.45 | 1.78 | 0.86 | 0.65 | 0.80 | 0 |
| Pain/discomfort |  |  |  |  |  |  |  |  |
| No problems | 34.53 | 38.25 | 47.37 | 40.75 | 31.55 | 28.90 | 27.86 | 28.61 |
| Slight problems | 40.39 | 43.03 | 35.52 | 41.17 | 41.86 | 38.67 | 42.89 | 39.37 |
| Moderate problems | 18.55 | 13.88 | 12.49 | 13.34 | 20.66 | 22.86 | 21.95 | 23.90 |
| Severe problems | 5.82 | 4.23 | 3.61 | 3.45 | 5.41 | 8.95 | 6.77 | 8.12 |
| Extreme problems | 0.71 | 0.61 | 1.01 | 1.28 | 0.52 | 0.61 | 0.54 | 0 |
| Anxiety/depression |  |  |  |  |  |  |  |  |
| No problems | 55.12 | 41.98 | 49.63 | 50.03 | 52.92 | 55.86 | 64.94 | 71.59 |
| Slight problems | 27.30 | 29.95 | 30.85 | 33.02 | 25.90 | 25.64 | 24.76 | 16.50 |
| Moderate problems | 11.48 | 18.06 | 13.27 | 10.29 | 14.24 | 12.17 | 7.05 | 6.23 |
| Severe problems | 4.94 | 8.59 | 4.72 | 5.04 | 5.46 | 5.62 | 2.30 | 5.68 |
| Extreme problems | 1.17 | 1.41 | 1.54 | 1.62 | 1.49 | 0.71 | 0.94 | 0 |

**Appendix 2**

**Table A2: Mean EQ-5D-5L index scores by age categories by number of medical conditions (weighted sample)**

|  | **Total** | | **0 medical condition** | | **1 medical condition** | | **2 medical conditions** | | **3 or more medical conditions** | |
| --- | --- | --- | --- | --- | --- | --- | --- | --- | --- | --- |
|  | n | Mean (SD) | n | Mean (SD) | n | Mean (SD) | n | Mean (SD) | n | Mean (SD) |
| Total sample | 5504 | 0.84 (0.21) | 1687 | 0.92 (0.14)* | 1448 | 0.84 (0.20)* | 932 | 0.84 (0.18)* | 1437 | 0.73 (0.26) * |
| Age category, years |  |  |  |  |  |  |  |  |  |  |
| 18-24 | 486 | 0.83 (0.19) * | 222 | 0.89 (0.14) * | 151 | 0.80 (0.22) * | 56 | 0.77 (0.19) * | 54 | 0.74 (0.18) |
| 25-34 | 831 | 0.85 (0.20) | 396 | 0.92 (0.14) | 234 | 0.82 (0.24) | 96 | 0.84 (0.17) | 106 | 0.71  (0.25) |
| 35-44 | 854 | 0.85 (0.21) | 346 | 0.93 (0.11) | 222 | 0.82 (0.19) | 132 | 0.83 (0.19) | 153 | 0.69  (0.33) |
| 45-54 | 848 | 0.84 (0.20) | 251 | 0.91 (0.17) | 248 | 0.85 (0.17) | 173 | 0.82 (0.19) | 176 | 0.73  (0.26) |
| 55-64 | 1023 | 0.81 (0.23) | 238 | 0.92 (0.14) | 259 | 0.83 (0.22) | 183 | 0.83 (0.18) | 344 | 0.71  (0.27) |
| 65-74 | 1156 | 0.84 (0.19) | 198 | 0.94 (0.09) | 278 | 0.87 (0.17) | 231 | 0.86 (0.18) | 450 | 0.77  (0.23) |
| ≥ 75 | 306 | 0.83 (0.21) | 38 | 0.92 (0.17) | 55 | 0.88 (0.14) | 60 | 0.91 (0.08) | 153 | 0.75  (0.25) |

* p≤0.0007
